## Effects of Fentanyl Versus Sufentanil in Equianesthetic Doses on Middle Cerebral Artery Blood Flow Velocity

Michael R. Trindle, M.D.,\* Barbara A. Dodson, M.D.,† Ira J. Rampil, M.D.†

**Background:** Sufentanil has been reported to increase cerebral blood flow in comparison with fentanyl. However, because of the use of animal models, supraclinical doses and/or background anesthetic agents, the clinical applicability of these studies remains difficult to assess. Therefore, transcranial Doppler ultrasonography was used to determine the cerebral hemodynamic effects of equianesthetic doses of fentanyl and sufentanil on middle cerebral artery (MCA) blood flow velocity in patients without intracranial pathologic conditions.

**Methods:** Twenty-four unpremedicated American Society of Anesthesiologists physical status 1 and 2 patients undergoing elective nonintracranial neurosurgery were assigned randomly to receive equipotent blinded infusions of either sufentanil (15 µg/min) or fentanyl (150 µg/min) for anesthetic induction during spontaneous ventilation of 100% oxygen. Normocapnia, as measured by infrared capnography, was maintained by manually assisting ventilation, as necessary. The cerebral opioid effect was quantified using the spectral edge frequency parameter. The infusion was continued until either 1) spectral edge frequency decreased below 10 Hz or 2) 150 µg of sufentanil or 1,500 µg of fentanyl was infused, whichever occurred first. On average, the patients received  $1.7 \pm 0.55$  µg/kg or  $16 \pm 4$  µg/kg of sufentanil or fentanyl, respectively. The right MCA mean, peak systolic, and peak di-

astolic velocities and pulsatility index were measured continuously by transcranial Doppler ultrasonography.

**Results:** The mean arterial pressure decreased slightly in both groups, but only in the fentanyl group were the changes significant. The MCA velocity increased by approximately 25% in both groups. However, the relative changes in MCA velocity were not different between groups. The pulsatility indexes were unchanged in both groups.

**Conclusions:** These data suggest that, at clinically relevant doses in the absence of other drugs, cerebral blood flow velocity is increased by both fentanyl and sufentanil. Furthermore, there appears to be no significant differences in the cerebral hemodynamic profiles of the two drugs, as assessed by transcranial Doppler ultrasonography. (Key words: Cerebral blood flow. Monitoring, cerebral: transcranial Doppler ultrasonography; electroencephalography: spectral edge frequency capnography. Opioids: fentanyl; sufentanil.)

THE effects of opioids on cerebral hemodynamics remain controversial. For example, fentanyl and sufentanil both are reported to either increase or decrease cerebral blood flow (CBF) and/or cerebrospinal fluid pressure depending on study conditions.<sup>1-7</sup> The results vary according to the model used (animal or human), opioid regimen (supraclinical *vs.* routine dose), and presence of confounding variables (*e.g.*, background anesthetic agents or reduced intracranial compliance).

Transcranial Doppler ultrasonography (TCD) is a relatively new noninvasive technology that offers a reliable measurement of cerebral blood flow velocity and, potentially, therefore, a technique for assessing the cerebral hemodynamic effects of opioids. Several studies have reported that changes in CBF velocity (measured by TCD) were correlated closely with changes in cerebral hemodynamics induced by physiologic and/or pharmacologic challenges.<sup>1,8-11</sup> Therefore, we used TCD to measure CBF velocity in the right middle cerebral artery (MCA) of patients before and after infusion of either fentanyl or sufentanil to assess the effect of these agents alone on cerebral hemodynamics.

This article is accompanied by a Highlight. Please see:  
ANESTHESIOLOGY 78:25A, 1993.

\* Clinical Instructor.

† Assistant Professor.

Received from the Department of Anesthesia, University of California, San Francisco. Accepted for publication October 28, 1992. Supported in part by the Anesthesia Research Foundation, San Francisco, California. Presented in part at the Annual Meeting of the American Society of Anesthesiologists, New Orleans, Louisiana, October 17-21, 1992.

Address reprint requests to Dr. Dodson: Department of Anesthesia, C-450 Box 0648, University of California, San Francisco, San Francisco, California 94143-0648.

‡ Milde LN, Milde JH: Cerebral effects of sufentanil in dogs with reduced intracranial compliance (abstr). *Anesthesia and Analgesia* 68:S1-S321, 1989.

arterial and venous transcranial Doppler recordings in humans. *Stroke* 22:1148-1154, 1991

11. Bisonnette B, Leon JE: Cerebrovascular stability during isoflurane anaesthesia in children. *Can J Anaesth* 39:128-134, 1992

12. Aaslid R, Lindegaard KF: Cerebral hemodynamics, Transcranial Doppler Sonography. Edited by Aaslid R. New York, Springer-Verlag, 1986, pp 60-85

13. Scott JC, Ponganis KV, Stanski DR: EEG quantitation of narcotic effect: The comparative pharmacodynamics of fentanyl and alfentanil. *ANESTHESIOLOGY* 62:234-241, 1985

14. Scott JC, Cooke JE, Stanski DR: Electroencephalographic quantitation of opioid effect: Comparative pharmacodynamics of fentanyl and sufentanil. *ANESTHESIOLOGY* 74:34-42, 1991

15. Young WL, Prohovnik I, Ornstein E, Ostapovich N, Matteo RS: Cerebral blood flow reactivity to changes in carbon dioxide calculated using end-tidal versus arterial tensions. *J Cereb Blood Flow Metab* 11:1031-1035, 1991

16. Ringelstein EB, Sievers C, Ecker S, Schneider PA, Otis SM: Noninvasive assessment of CO<sub>2</sub> induced cerebral vasomotor response in normal individuals and patients with internal carotid artery occlusions. *Stroke* 19:963-969, 1988

17. Markwalder TM, Grolimund P, Seiler RW, Roth F, Aaslid R: Dependency of blood flow velocity in the middle cerebral artery on end-tidal carbon dioxide partial pressure: A transcranial ultrasound Doppler study. *J Cereb Blood Flow Metab* 4:368-372, 1984

18. Kontos HA, Wei EP, Navari RM, Levasseur JE, Rosenblum WI, Patterson JL: Responses of cerebral arteries and arterioles to acute hypotension and hypertension. *Am J Physiol* 234:H371-H383, 1978

19. Stromberg DD, Fox JR: Pressure in the pial arterial microcirculation of the cat during changes in systemic arterial blood pressure. *Circ Res* 31:229-239, 1972

20. Michenfelder JD: Anesthesia and the Brain. New York, Churchill Livingstone, 1988, pp 113-115

21. Petty GW, Wiebers DO, Meissner I: Transcranial Doppler ultrasonography: Clinical applications in cerebrovascular disease. *Mayo Clin Proc* 65:1350-1364, 1990

22. Harders A, Gilbach J: Transcranial Doppler sonography and its applications in extracranial-intracranial bypass surgery. *Neurol Res* 7:129-141, 1985

23. Hennerici M, Rautenberg W, Sitzer G, Schwartz A: Transcranial Doppler ultrasound for the assessment of intracranial arterial flow velocity: Part 1. *Surg Neurol* 27:439-448, 1987
